# Supplementary material for: Preexposure Prophylaxis Modality Preferences Among Men Who Have Sex With Men and Use Social Media in the United States
Source: PubMed Central journal article supplement (PMC4909393; doi:10.2196/jmir.5713), 2016-05-19
Supplement: jmir_v18i5e111_app1.pdf [file jmir_v18i5e111_app1.pdf]

Multimedia Appendix 1. Odds ratios for demographic characteristics and stated likelihood of using different pre-exposure prophylaxis modalities among MSM participating in an online survey, United States, April-July 2015

| <b>Characteristic</b>             | <b>Odds Ratio<sup>a</sup><br/>(95% CI)</b> | <b>Type 3<br/>P value</b> | <b>Odds Ratio<sup>a</sup><br/>(95% CI)</b> | <b>Type 3<br/>P value</b> | <b>Odds Ratio<sup>a</sup><br/>(95% CI)</b> | <b>Type 3<br/>P value</b> |
|-----------------------------------|--------------------------------------------|---------------------------|--------------------------------------------|---------------------------|--------------------------------------------|---------------------------|
| <b>Systemic Modalities</b>        |                                            |                           |                                            |                           |                                            |                           |
|                                   | Daily oral pills                           |                           | Injection <sup>b</sup>                     |                           | On-demand pills <sup>c</sup>               |                           |
| <b>Race/Ethnicity</b>             |                                            | 0.011                     |                                            | 0.458                     |                                            | 0.372                     |
| White, not Hispanic               | Reference                                  |                           | Reference                                  |                           | Reference                                  |                           |
| Black, not Hispanic               | 3.10 (1.35-7.13)                           |                           | 1.05 (0.55-2.01)                           |                           | 1.45 (0.68-3.09)                           |                           |
| Hispanic                          | 1.36 (0.91-2.03)                           |                           | 1.32 (0.92-1.91)                           |                           | 1.32 (0.87-1.99)                           |                           |
| Other                             | 1.76 (0.95-3.25)                           |                           | 1.23 (0.71-2.11)                           |                           | 1.37 (0.74-2.54)                           |                           |
| <b>Age (years)</b>                |                                            | 0.015                     |                                            | 0.708                     |                                            | 0.158                     |
| 18-24                             | 1.52 (1.05-2.20)                           |                           | 1.05 (0.75-1.48)                           |                           | 1.04 (0.70-1.54)                           |                           |
| 25-29                             | 1.00 (0.68-1.49)                           |                           | 1.16 (0.80-1.68)                           |                           | 0.76 (0.50-1.15)                           |                           |
| 30-34                             | Reference                                  |                           | Reference                                  |                           | Reference                                  |                           |
| <b>Highest level of education</b> |                                            | 0.005                     |                                            | 0.205                     |                                            | 0.158                     |
| High School or less               | Reference                                  |                           | Reference                                  |                           | Reference                                  |                           |
| Some college                      | 0.76 (0.39-1.47)                           |                           | 1.07 (0.61-1.85)                           |                           | 0.53 (0.25-1.09)                           |                           |
| Bachelor degree                   | 0.51 (0.27-0.98)                           |                           | 1.48 (0.85-2.55)                           |                           | 0.54 (0.26-1.11)                           |                           |
| Any graduate school               | 0.43 (0.22-0.83)                           |                           | 1.30 (0.75-2.26)                           |                           | 0.44 (0.21-0.91)                           |                           |
| <b>U.S. Census region</b>         |                                            | 0.645                     |                                            | 0.766                     |                                            | 0.785                     |
| Midwest                           | 0.99 (0.63-1.55)                           |                           | 0.92 (0.60-1.39)                           |                           | 0.90 (0.56-1.44)                           |                           |
| Northeast                         | 0.93 (0.61-1.43)                           |                           | 0.80 (0.54-1.21)                           |                           | 0.79 (0.51-1.24)                           |                           |
| South                             | 1.17 (0.79-1.73)                           |                           | 0.91 (0.63-1.31)                           |                           | 0.90 (0.60-1.37)                           |                           |
| West                              | Reference                                  |                           | Reference                                  |                           | Reference                                  |                           |
| <b>Topical Modalities</b>         |                                            |                           |                                            |                           |                                            |                           |
|                                   | Penis gel, before                          |                           | Penis gel, after                           |                           | Rectal gel, before                         |                           |
| <b>Race/Ethnicity</b>             |                                            | 0.037                     |                                            | 0.115                     |                                            | 0.002                     |
| White, not Hispanic               | Reference                                  |                           | Reference                                  |                           | Reference                                  |                           |
| Black, not Hispanic               | 6.59 (1.54-28.24)                          |                           | 2.82 (1.05-7.59)                           |                           | 4.28 (1.73-10.61)                          |                           |
| Hispanic                          | 1.27 (0.81-2.00)                           |                           | 1.32 (0.85-2.06)                           |                           | 1.45 (0.97-2.17)                           |                           |
| Other                             | 1.65 (0.76-3.59)                           |                           | 0.83 (0.40-1.70)                           |                           | 1.85 (0.96-3.56)                           |                           |
| <b>Age (years)</b>                |                                            | 0.056                     |                                            | 0.712                     |                                            | 0.680                     |
| 18-24                             | 1.61 (1.06-2.45)                           |                           | 0.99 (0.65-1.50)                           |                           | 0.88 (0.59-1.31)                           |                           |
| 25-29                             | 1.16 (0.75-1.79)                           |                           | 0.86 (0.56-1.34)                           |                           | 0.83 (0.54-1.26)                           |                           |
| 30-34                             | Reference                                  |                           | Reference                                  |                           | Reference                                  |                           |
| <b>Highest level of education</b> |                                            | 0.342                     |                                            | 0.851                     |                                            | 0.073                     |
| High School or less               | Reference                                  |                           | Reference                                  |                           | Reference                                  |                           |
| Some college                      | 1.03 (0.47-2.24)                           |                           | 0.80 (0.38-1.67)                           |                           | 0.62 (0.31-1.24)                           |                           |
| Bachelor degree                   | 0.91 (0.43-1.93)                           |                           | 0.89 (0.43-1.83)                           |                           | 0.50 (0.25-0.98)                           |                           |

|                           |                  |       |                  |       |                  |
|---------------------------|------------------|-------|------------------|-------|------------------|
| Any graduate school       | 0.71 (0.33-1.51) |       | 0.78 (0.38-1.61) |       | 0.44 (0.22-0.88) |
| <b>U.S. Census region</b> |                  | 0.894 |                  | 0.979 | 0.470            |
| Midwest                   | 0.82 (0.49-1.36) |       | 1.06 (0.64-1.73) |       | 0.78 (0.48-1.25) |
| Northeast                 | 0.92 (0.56-1.50) |       | 0.95 (0.59-1.53) |       | 0.73 (0.46-1.14) |
| South                     | 0.90 (0.57-1.41) |       | 0.97 (0.63-1.50) |       | 0.91 (0.60-1.38) |
| West                      | Reference        |       | Reference        |       | Reference        |

**Topical Modalities, continued**

|                                   | Rectal gel, after |       | Suppository, before |       | Suppository, after |
|-----------------------------------|-------------------|-------|---------------------|-------|--------------------|
| <b>Race/Ethnicity</b>             |                   | 0.137 |                     | 0.057 | 0.548              |
| White, not Hispanic               | Reference         |       | Reference           |       | Reference          |
| Black, not Hispanic               | 2.52 (1.14-5.58)  |       | 2.69 (1.26-5.77)    |       | 1.28 (0.60-2.71)   |
| Hispanic                          | 1.03 (0.69-1.54)  |       | 1.30 (0.86-1.97)    |       | 0.81 (0.54-1.22)   |
| Other                             | 1.25 (0.66-2.35)  |       | 1.15 (0.61-2.17)    |       | 1.22 (0.68-2.22)   |
| <b>Age (years)</b>                |                   | 0.254 |                     | 0.691 | 0.113              |
| 18-24                             | 0.85 (0.57-1.26)  |       | 0.87 (0.57-1.31)    |       | 0.73 (0.49-1.09)   |
| 25-29                             | 0.70 (0.46-1.08)  |       | 0.83 (0.53-1.29)    |       | 0.63 (0.41-0.97)   |
| 30-34                             | Reference         |       | Reference           |       | Reference          |
| <b>Highest level of education</b> |                   | 0.041 |                     | 0.266 | 0.735              |
| High School or less               | Reference         |       | Reference           |       | Reference          |
| Some college                      | 0.81 (0.40-1.63)  |       | 0.62 (0.32-1.21)    |       | 0.76 (0.39-1.49)   |
| Bachelor degree                   | 0.54 (0.27-1.07)  |       | 0.53 (0.27-1.02)    |       | 0.73 (0.38-1.41)   |
| Any graduate school               | 0.52 (0.26-1.05)  |       | 0.55 (0.28-1.07)    |       | 0.85 (0.44-1.65)   |
| <b>U.S. Census region</b>         |                   | 0.845 |                     | 0.784 | 0.446              |
| Midwest                           | 1.10 (0.68-1.77)  |       | 0.83 (0.51-1.37)    |       | 0.73 (0.46-1.18)   |
| Northeast                         | 0.91 (0.58-1.42)  |       | 0.82 (0.51-1.31)    |       | 0.73 (0.47-1.14)   |
| South                             | 1.05 (0.70-1.59)  |       | 0.96 (0.63-1.46)    |       | 0.75 (0.50-1.12)   |
| West                              | Reference         |       | Reference           |       | Reference          |

<sup>a</sup>Compares respondents that are “somewhat likely” or “very likely” to respondents that indicated they are “somewhat unlikely” or “very unlikely” to use each modality. Responses that were “neither likely or unlikely” were set to missing. Wald chi-square type 3 *P* values were used with an alpha=0.05.

<sup>b</sup>Every 1-3 months

<sup>c</sup>Two pills 24 hours before sex and two one-pill doses after.
